# Supplementary material for: Detection of Four Porcine Enteric Coronaviruses Using CRISPR-Cas12a Combined with Multiplex Reverse Transcriptase Loop-Mediated Isothermal Amplification Assay
Source: MDPI journal article supplement (doi:10.3390/v14040833), 2022-04-17
Supplement: s1 [file s1]

## Supplementary Information

### Detection of four porcine enteric coronaviruses using CRISPR-Cas12a combined with multiplex reverse transcriptase loop-mediated isothermal amplification assay

Jiajia Liu<sup>1#</sup>, Dagang Tao<sup>2#</sup>, Xinquan Chen<sup>1</sup>, Linyuan Shen<sup>1</sup>, Li Zhu<sup>1</sup>, Bingrong Xu<sup>2</sup>, Hailong Liu<sup>2</sup>, Shuhong Zhao<sup>2,3,4</sup>, Xinyun Li<sup>2,3</sup>, Xiangdong Liu<sup>2,3</sup>, Shengsong Xie<sup>2,3\*</sup>, Lili Niu<sup>1\*</sup>

<sup>1</sup>College of Animal Science and Technology, Sichuan Agricultural University, Chengdu 611130, China; jjliu0419@foxmail.com (J.L.); chenxinquan0705@foxmail.com (X.C.); shenlinyuan0815@163.com (L.S.); zhuli@sicau.edu.cn (L.Z.)

<sup>2</sup>Key Laboratory of Agricultural Animal Genetics, Breeding and Reproduction of Ministry of Education and Key Lab of Swine Genetics and Breeding of Ministry of Agriculture and Rural Affairs, Huazhong Agricultural University, Wuhan 430070, China; dagangtao@foxmail.com (D.T.); xubingrongxu@163.com (B.X.); hailongliu@webmail.hzau.edu.cn (H.L.); shzhao@mail.hzau.edu.cn (S.Z.); xyli@mail.hzau.edu.cn (X.L.); liuxiangdong@mail.hzau.edu.cn (X.L.)

<sup>3</sup>The Cooperative Innovation Center for Sustainable Pig Production, Huazhong Agricultural University, Wuhan 430070, China

<sup>4</sup>Hubei Hongshan Laboratory, Frontiers Science Center for Animal Breeding and Sustainable Production, Wuhan 430070, China

†These authors contributed equally to the study.

\*Correspondences: ssxie@mail.hzau.edu.cn (S.X.); niulili@sicau.edu.cn (L.N.)

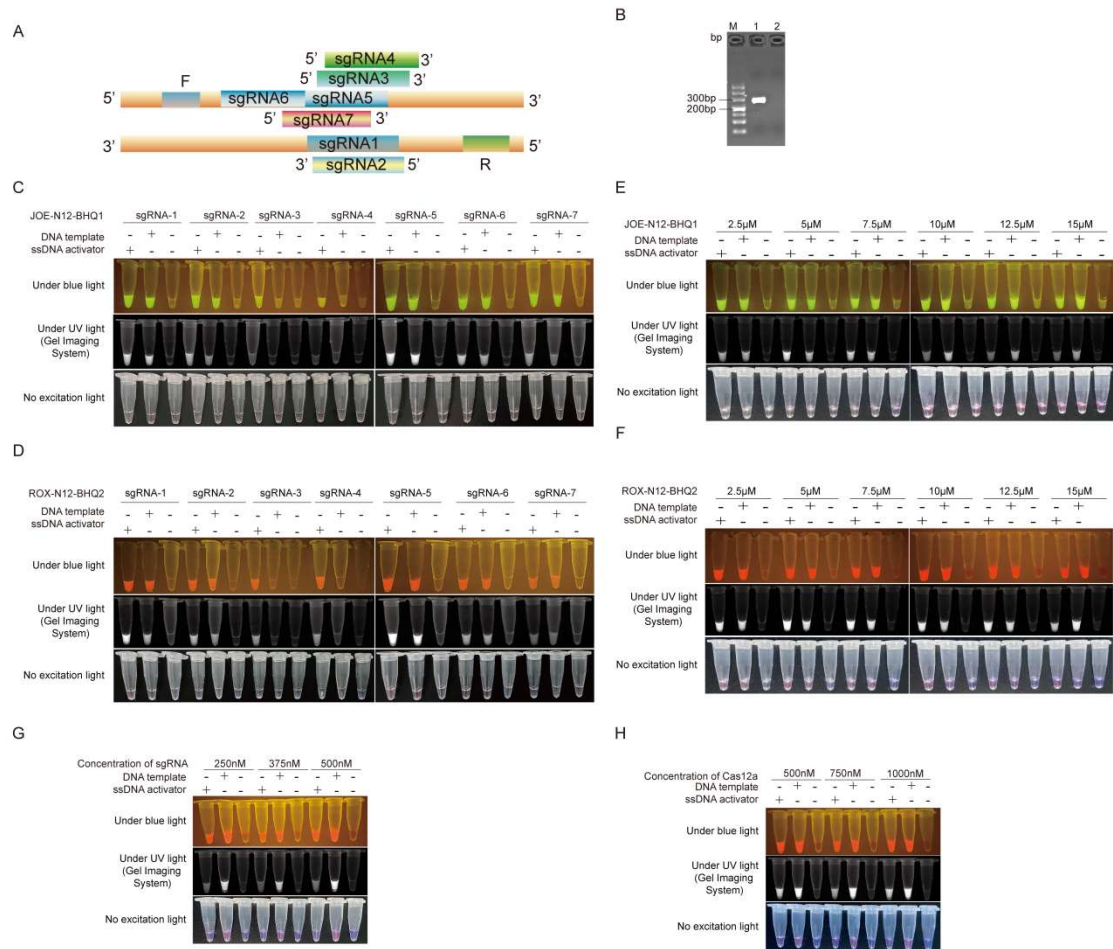

**Fig S1. Screening of highly activity sgRNAs for detection of PEDV *ORF3* gene and optimum reaction conditions.** (A) Schematic diagram of the PCR primers (F/R) and sgRNAs for detection of *ORF3* gene; (B) The *ORF3* amplicon was examined by agarose gel electrophoresis (265 bp); Lane M, DNA Ladder; bp, base pairs; Lane 1, *ORF3*-plasmid (PUC57-*ORF3*); Lane 2, non-template control (NTC). (C) Colorimetric/fluorescence Cas12a-based assay for detection of PEDV *ORF3*, JOE-dye ssDNA-FQ reporter was used; (D) Colorimetric/fluorescence Cas12a-based assay for detection of PEDV *ORF3*, ROX-dye ssDNA-FQ reporter was used; (E) Evaluation the optimum concentration of JOE-dye ssDNA-FQ reporter for CRISPR/Cas12a-based cleavage assay; (F) Evaluation the optimum concentration of ROX-dye ssDNA-FQ reporter for CRISPR/Cas12a-based cleavage assay; (G) Evaluation the optimum concentration of sgRNA for CRISPR/Cas12a-based cleavage assay; (H) Evaluation the optimum concentration of Cas12a protein for CRISPR/Cas12a-based cleavage assay.

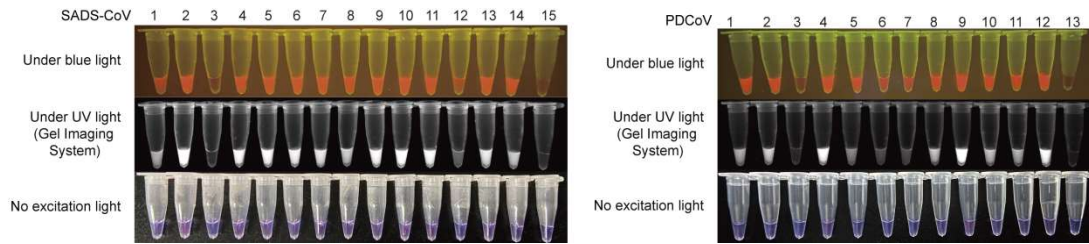

**Fig S2. Screening of highly activity sgRNAs for detection of PDCoV *N* and SADS-CoV *N* gene.** **(A)** Colorimetric/fluorescence CRISPR/Cas12a-based assay for detection of SADS-CoV *N* gene; 1-14 represents SADS-CoV *N* gene plasmid used as a template for testing the activity of from sgRNA1 to sgRNA14; 15, non-template control (NTC); **(B)** Colorimetric/fluorescence CRISPR/Cas12a-based assay for detection of PDCoV *N* gene; 1-12 represents PDCoV *N* gene plasmid used as a template for testing the activity of from sgRNA1 to sgRNA12; 13, non-template control (NTC).

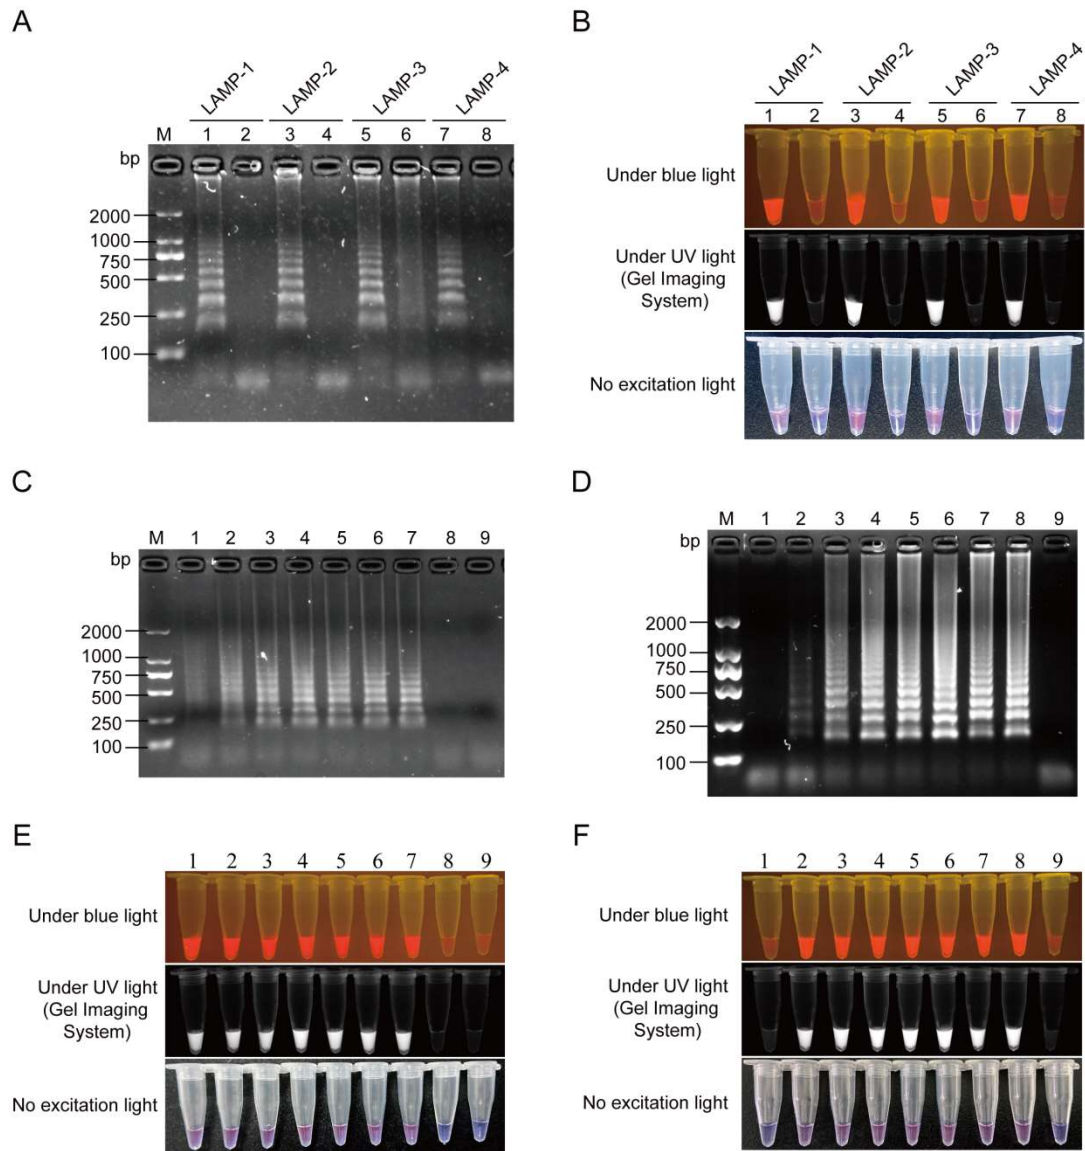

**FigS3. Optimization of the reaction conditions in LAMP for PEDV detection.** (A) The amplification efficiencies of four LAMP primer pairs by electrophoresis analysis. (B) Detecting the fluorescence signal of PEDV *ORF3* gene under the blue (470 nm) and UV lights in CRISPR/Cas12a cleavage assay; Lane M: DNA ladder, bp: base pairs. Lanes or tubes: 1, 3, 5, 7: PEDV-ORF3 plasmid DNA; 2, 4, 6, 8: non-template control. (C, E) The effect of the reaction temperature on LAMP-Cas12a assay; Lane M: DNA Ladder 2000 Maker; Lanes or tubes: 1: 53 °C; 2: 55 °C; 3: 57.5 °C; 4: 60 °C; 5: 62.5 °C; 6: 65 °C; 7: 67.5 °C; 8: 71 °C; 9: non-template control (NTC; 65 °C); (D, F) The effect of reaction time on LAMP-Cas12a assay; Lane M: DNA Ladder 2000 Maker; Lanes or tubes: 1: 5 min; Lane 2: 15 min; Lane 3: 20 min; Lane 4: 25 min; Lane 5: 30 min; Lane 6: 35 min; Lane 7: 40 min; Lane 8: 45 min; lane 9: non-template control (NTC; 45 min).

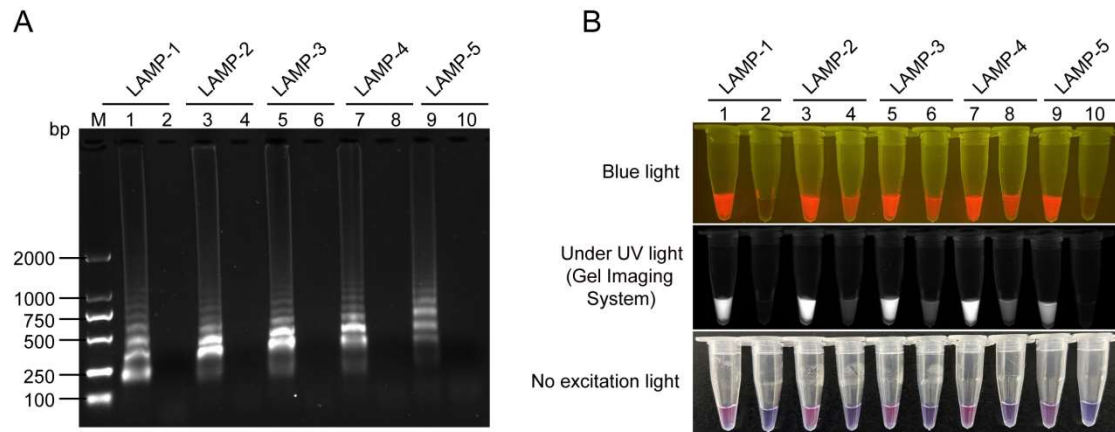

**Fig S4. Screening of LAMP primer pairs for detection of TGEV *N* gene.** (A) Agarose gel electrophoresis of LAMP products of TGEV *N* gene; (B) CRISPR/Cas12a cleavage assay to detection LAMP products of TGEV *N* gene. 1, 3, 5, 7, 9: TGEV-N plasmid DNA; 2, 4, 6, 8, 10: non-template control (NTC).

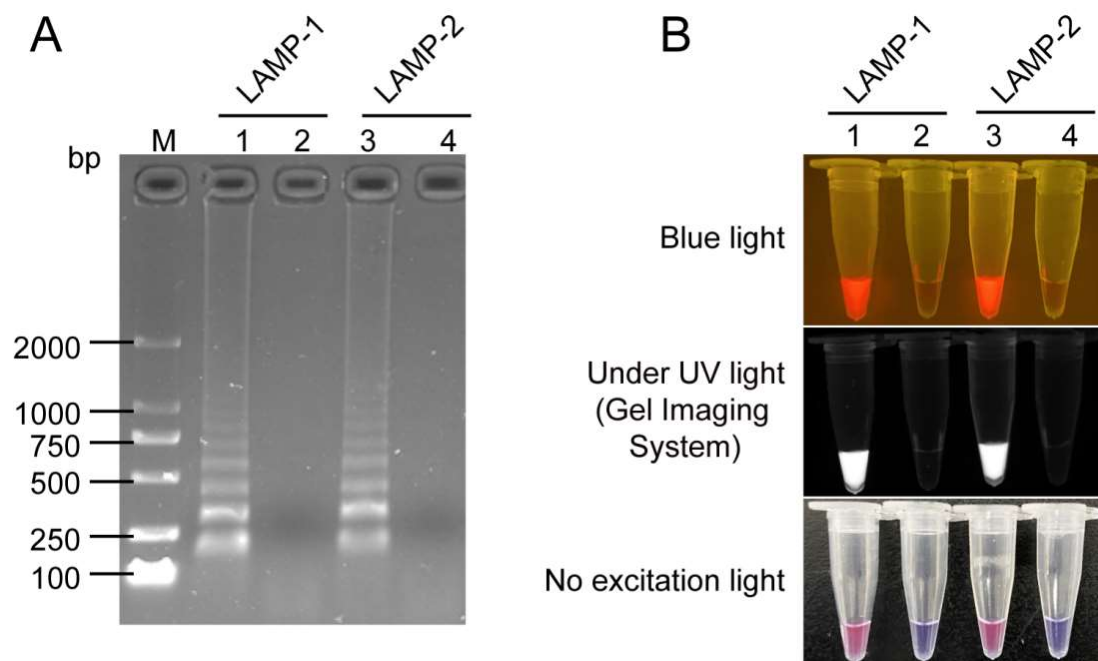

**Fig S5. Screening of LAMP primer pairs for detection of PDCoV *N* gene.** (A) Agarose gel electrophoresis of LAMP products of PDCoV *N* gene; (B) CRISPR/Cas12a cleavage assay to detection LAMP products of PDCoV *N* gene; 1, 3: PDCoV-N plasmid DNA was used as template; 2, 4: non-template control (NTC).

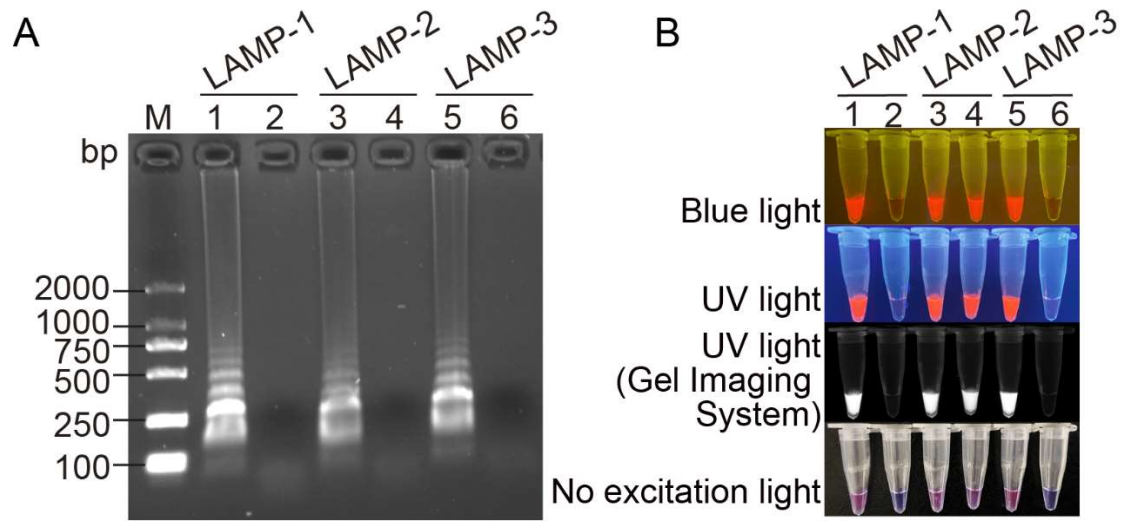

**Fig S6. Screening of LAMP primer pairs for detection of SADS-CoV *N* gene.** (A) Agarose gel electrophoresis of LAMP products of SADS-CoV *N* gene; (B) CRISPR/Cas12a cleavage assay to detection LAMP products of SADS-CoV *N* gene. 1, 3, 5: SADS-CoV-*N* plasmid DNA was used as template; 2, 4, 6: non-template control (NTC).



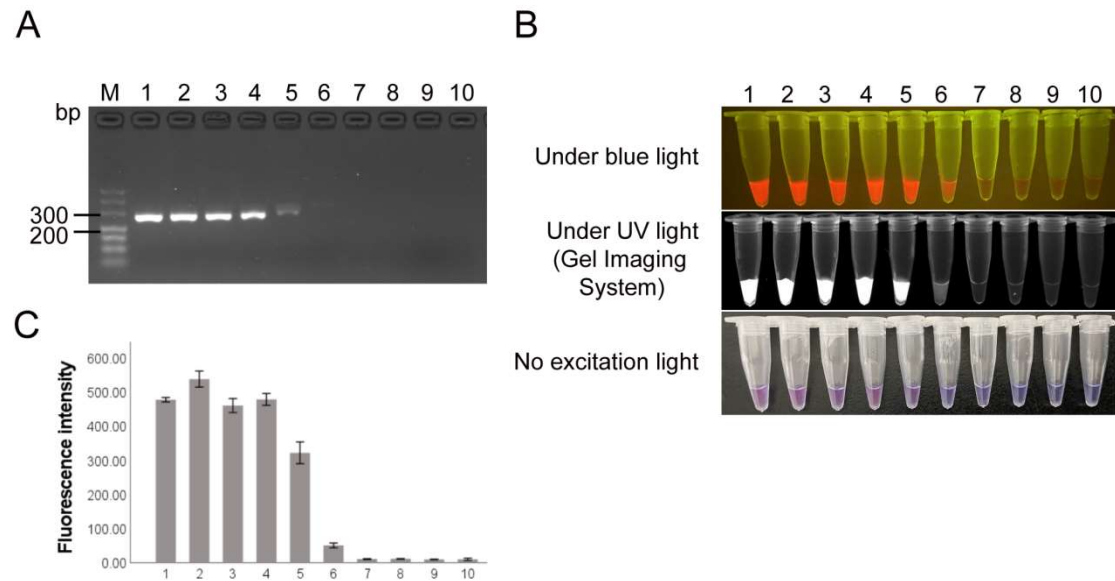

**Fig S7. Sensitivity of the PCR-Cas12a assay for detection of *ORF3* gene using serially diluted *ORF3*-plasmid ( $8 \times 10^7$  to  $8 \times 10^0$  copies/ $\mu\text{L}$ ).** (A) Products of the PCR reaction by using agarose gel electrophoresis analysis; (B) Colorimetric/fluorescence signals from a series of 10-fold dilutions of PUC57-*ORF3* plasmid DNA using PCR-Cas12a assay; (C) Sensitivity of the PCR-Cas12a assay in a multi-functional microplate reader (n=3); Lane M, DNA Ladder; bp, base pairs; 1,  $8 \times 10^7$  copies/ $\mu\text{L}$ ; 2,  $8 \times 10^6$  copies/ $\mu\text{L}$ ; 3,  $8 \times 10^5$  copies/ $\mu\text{L}$ ; 4,  $8 \times 10^4$  copies/ $\mu\text{L}$ ; 5,  $8 \times 10^3$  copies/ $\mu\text{L}$ ; 6,  $8 \times 10^2$  copies/ $\mu\text{L}$ ; 7,  $8 \times 10^1$  copies/ $\mu\text{L}$ ; 8,  $8 \times 10^0$  copies/ $\mu\text{L}$ ; 9,  $1 \times 10^0$  copies/ $\mu\text{L}$ ; 10, non-template control (NTC).



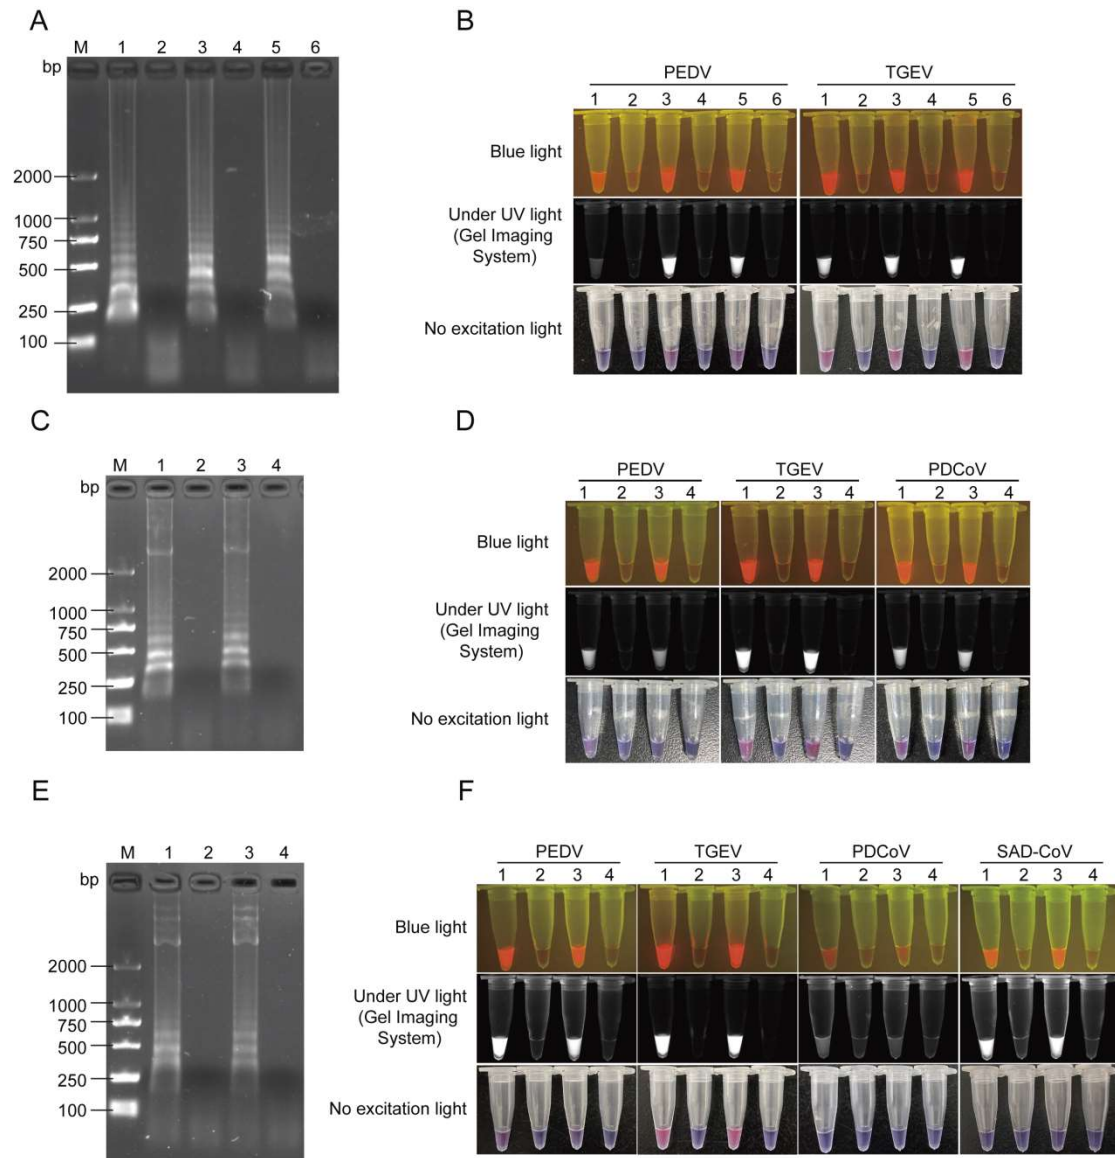

**Fig S8. Establishment of multiple LAMP-Cas12a assay for porcine diarrhea coronavirus.** (A) The agarose gel electrophoresis for detection of double amplification of PEDV and TGEV; (B) The fluorescence signal of Cas12a-based assay for detection of double amplification of PEDV and TGEV; 1, 2: original primer concentration; 3, 4: 1/2 dilution of the original primer concentration; 5, 6: 1/3 dilution of the original primer concentration; 1, 3, 5: plasmid DNA; 2, 4, 6: non-template control (NTC); (C) The agarose gel electrophoresis for detection of triple amplification of PEDV, TGEV and PDCoV; (D) The fluorescence signal of Cas12a-based assay for detection of triple amplification of PEDV, TGEV and PDCoV; 1, 2: 1/3 dilution of original primer concentration; 3, 4: 1/4 dilution of original primer concentration; (E) The agarose gel electrophoresis for detection of quadruple amplification of PEDV, TGEV, PDCoV and SADS-CoV; (F) The fluorescence signal of Cas12a-based assay for detection of quadruple

amplification of PEDV, TGEV, PDCoV and SADS-CoV; 1, 2: 1/3 dilution of original primer concentration; 3,4: 1/4 dilution of original primer concentration.

**Table S1. Synthetic insert cloned into pUC57 and pMD18T vector.**

| Oligonucleotides<br>Name | Sequence (5'-3')                  | Size of<br>oligonucleotides<br>(bp) |
|--------------------------|-----------------------------------|-------------------------------------|
| TGEV-N                   | AACTTATGTCCGAGAGACTTTGTACCCAAAG   | 750                                 |
|                          | GAATAGGTAACAGGGATCAGCAGATTGGTT    |                                     |
|                          | ATTGGAATAGACAAACTCGCTATCGCATGGT   |                                     |
|                          | GAAGGGCCAACGTAAAGAGCTTCCTGAAAG    |                                     |
|                          | GTGGTTCTTCTACTACTTAGGTAAGTGGACCTC |                                     |
|                          | ATGCAGATGCCAAATTTAAAGATAAATTAGA   |                                     |
|                          | TGGAGTTGTCTGGGTTGCCAAGGATGGTGCC   |                                     |
|                          | ATGAACAAACCAACCACGCTTGGTAGTCGTG   |                                     |
|                          | GTGCTAATAATGAATCCAAAGCTTTGAAATT   |                                     |
|                          | CGATGGTAAAGTGCCAGGCGAATTTCAACTT   |                                     |
|                          | GAAGTTAACCAGTCAAGGGACAATTCAAGG    |                                     |
|                          | TCACGCTCTCAATCTAGATCTCGGTCTAGAA   |                                     |
|                          | ACAGATCTCAATCTAGAGGCAGGCAACAAT    |                                     |
|                          | CCAATAACAAGAAGGATGACAGTGTAGAAC    |                                     |
|                          | AAGCTGTTCTTGCCGCACTTAAAAAGTTAGG   |                                     |
|                          | TGTTGACACAGAAAAACAACAGCAACGTTC    |                                     |
|                          | TCGTTCTAAATCTAAAGAACGTAGTAACTCT   |                                     |
|                          | AAAACAAGAGATACTACGCCTAAGAATGAA    |                                     |
|                          | AACAAACACACCTGGAAGAGAACTGCAGGT    |                                     |
|                          | AAAGGTGATGTGACAAGATTTTATGGAGCTA   |                                     |
|                          | GAAGCAGTTCAGCCAATTTTGGTGACAGTGA   |                                     |
|                          | CCTCGTTGCCAATGGGAGCAGTGCCAAGCAT   |                                     |
|                          | TACCCACAATTGGCTGAATGTGTTCCATCTGT  |                                     |
|                          | GTCTAGCATTTTGTGTTGGAAGCTATTGGACTT |                                     |
|                          | CAAAGGAAGAT                       |                                     |



---

CTGACAAACAAGTCCAGTCTGCTAAACCCA  
AACAGCAGAAGAAACCTAAAAAGGTAATC  
TGCCAGCAGACAAACAGGATTGGGAGTGGG  
ATGATGCTTTTGAGATAAAGCAGGAATCAGC  
AGCGTAG

---

SAD-CoV-N

CCAACGTAAAGATCAGCCTTCTAACTGGCACT  
TTTATTACCTTGGTACTGGTCCTCACGCAGAT  
GCTCCTTTCAGGAAACGGATTCAGGGTGTGCA  
TTGGGTCGCTGTTGACGGTGCTAAAACTAGCC  
CCACAGGTCTTGGTGTTTCGCAATCGTAACAAA  
GAACCTGCTACACCTCAGTTTGGGTTTCAATT  
ACCACCAGACCTGACTGTTGTTGAGGTTACTT  
CTAGAAGTGCTTCACGTTACAGTCTCGTTCT  
CGCAATCAAAGTCAAAGCCGCAGTGGTGCTC  
AGACACCTCGTGCTCAACAGCCGTCACAGTCT  
GTTGACATTGTTGCTGCAGTTAAACAAGCTTT  
GGCAGACTTGGGCATAGCTTCTAGCCAGTCCA  
GGCCTCAAAGTGGTAAAAATACACCCAAACC  
AAGAAGCAGAGCTGTCTCACCTGCACCTGCC  
CCTAAACCGGCTCGTAAGCAGATGGACAAAC  
CTGAATGGAAGCGTGTTCTAATTCTGAGGAG  
GACGTGCGTAAATGCTTTGGTCCTCGCTCAGT  
TTCTAGAAATTTTGGTGACAGTGACCTCGTTC  
AGCACGGTGTTGAAGCTAAGCACTTTCCAAC  
AATTGCTGAGTTGCTTCCGACACAAGCTGCAC  
TAGCCTTTGGTAGTGAAATCACAACCAAAGA  
GTCTGGTGAATTTGTAGAAGTCACCTATCACT  
ATGTAATGAAGGTCCCCAAGACTGATAAAAA  
TCTACCCAGATTTCTTGAGCA

750

|           |                                   |     |
|-----------|-----------------------------------|-----|
| PEDV-ORF3 | AGACAAGCTTCAAATGTGACGGGTTTCTTTT   | 320 |
|           | CACCAGTGTTTTATCTACTTCTTGCCTGTT    |     |
|           | TAAAGCGTCTTCTTTGAGGCGCAATTATATTA  |     |
|           | TGTTGGCAGCGCGTTTTGCTGTCATTGTTCTTT |     |
|           | ATTGCCCACTTTTATATTATTGTGGTGCATTTT |     |
|           | TAGATGCAACTATTATTTGTTGCACACTTATTG |     |
|           | GCAGGCTTTGTTTAGTCTGCTTTTACTCCTGGC |     |
|           | GCTATAAAAATGCGCTCTTTATTATCTTTAATA |     |
|           | CTACGACACTTTCTTTCCTCAATGGTAAAGCA  |     |
|           | GCTTATTATGACGGCAAATCCATTGT        |     |

**Table S2. Primers and oligos used in this study.**

| Application                          | Oligonucleotides<br>Name | Primer sequence (5'-3')                        | Target ID       | Production<br>Length(bp) |
|--------------------------------------|--------------------------|------------------------------------------------|-----------------|--------------------------|
| PCR primers                          | SADS-N-T7-F              | TAATACGACTCACTATAGGCAGGAAACG<br>GATTCAGGG      | MG775253.<br>1  | 478                      |
|                                      | SADS-N-R                 | GGACCAAAGCATTACGC                              |                 |                          |
|                                      | PEDV-ORF3-F              | GAGGAAAGAAAGTGTCGTAG                           | KJ642645.1      | 265                      |
|                                      | PEDV-ORF3-R              | GACGGGTTTCTTTTCAC                              |                 |                          |
|                                      | T7-crRNA-F               | TCGCTATTACGCCAGCTGGC                           |                 |                          |
| sgRNA (For<br>In Vitro<br>synthesis) | PEDV-sgR1-R              | AGTCTGCTTTTACTCCTGGCGCTAATCTAC<br>AACAGTAGAAAT | PEDV-<br>sgRNA1 |                          |
|                                      | PEDV-sgR2-R              | TCTGCTTTTACTCCTGGCGCTATAATCTAC<br>AACAGTAGAAAT | PEDV-<br>sgRNA2 |                          |
|                                      | PEDV-sgR3-R              | GCGCATTTTATAGCGCCAGGAGTATCTAC<br>AACAGTAGAAAT  | PEDV-<br>sgRNA3 |                          |
|                                      | PEDV-sgR4-R              | AGCGCATTTTATAGCGCCAGGAGATCTA<br>CAACAGTAGAAAT  | PEDV-<br>sgRNA4 |                          |
|                                      | PEDV-sgR5-R              | ATAGCGCCAGGAGTAAAAGCAGACATCT<br>ACAACAGTAGAAAT | PEDV-<br>sgRNA5 |                          |
|                                      | PEDV-sgR6-R              | CAAAGCCTGCCAATAAGTGTGCAAATCTA<br>CAACAGTAGAAAT | PEDV-<br>sgRNA6 |                          |

|                                      |               |                                                |                     |
|--------------------------------------|---------------|------------------------------------------------|---------------------|
| sgRNA (For<br>In Vitro<br>synthesis) | PEDV-sgR7-R   | CGCCAGGAGTAAAAGCAGACTAAAATCT<br>ACAACAGTAGAAAT | PEDV-<br>sgRNA7     |
|                                      | TGEV-N-sgR1-R | GCTCTCAATCTAGATCTCGGTCTAATCTAC<br>AACAGTAGAAAT | TGEV-<br>sgRNA1     |
|                                      | TGEV-N-sgR2-R | AGAACAAGCTGTTCTTGCCGCACTATCTA<br>CAACAGTAGAAAT | TGEV-<br>sgRNA2     |
|                                      | TGEV-N-sgR3-R | AAAACAACAGCAACGTTCTCGTTCATCTA<br>CAACAGTAGAAAT | TGEV-<br>sgRNA3     |
|                                      | TGEV-N-sgR4-R | TAAATCTAAAGAACGTAGTAACTCATCTA<br>CAACAGTAGAAAT | TGEV-<br>sgRNA4     |
|                                      | TGEV-N-sgR5-R | CTTAAAAAGTTAGGTGTTGACACAATCTA<br>CAACAGTAGAAAT | TGEV-<br>sgRNA5     |
|                                      | TGEV-N-sgR6-R | CCCTTGACTGGTTAACTTCAAGTTATCTAC<br>AACAGTAGAAAT | TGEV-<br>sgRNA6     |
|                                      | SADS-sg1-R    | GTCTGTTGACATTGTTGCTGCAGTATCTAC<br>AACAGTAGAAAT | SADSCoV-<br>sgRNA1  |
|                                      | SADS-sg2-R    | AGCTGTCTCACCTGCACCTGCCCCATCTA<br>CAACAGTAGAAAT | SADSCoV-<br>sgRNA2  |
|                                      | SADS-sg3-R    | CGTGCTGAACGAGGTCACTGTCACATCTA<br>CAACAGTAGAAAT | SADSCoV-<br>sgRNA3  |
|                                      | SADS-sg4-R    | TCCTAATTCTGAGGAGGACGTGCGATCTA<br>CAACAGTAGAAAT | SADSCoV-<br>sgRNA4  |
|                                      | SADS-sg5-R    | GCTAGAAGCTATGCCCAAGTCTGCATCTA<br>CAACAGTAGAAAT | SADSCoV-<br>sgRNA5  |
|                                      | SADS-sg6-R    | TAGCCAGTCCAGGCCTCAAAGTGGATCTA<br>CAACAGTAGAAAT | SADSCoV-<br>sgRNA6  |
|                                      | SADS-sg7-R    | ATAGCTTCTAGCCAGTCCAGGCCTATCTA<br>CAACAGTAGAAAT | SADSCoV-<br>sgRNA7  |
|                                      | SADS-sg8-R    | GCTTTGGTCCTCGCTCAGTTTCTAATCTAC<br>AACAGTAGAAAT | SADSCoV-<br>sgRNA8  |
|                                      | SADS-sg9-R    | AATTTCTAGAAACTGAGCGAGGACATCTA<br>CAACAGTAGAAAT | SADSCoV-<br>sgRNA9  |
|                                      | SADS-sg10-R   | TAAACCGGCTCGTAAGCAGATGGAATCTA<br>CAACAGTAGAAAT | SADSCoV-<br>sgRNA10 |
|                                      | SADS-sg11-R   | TCAGGTCTGGTGGTAATTGAAACCATCTA<br>CAACAGTAGAAAT | SADSCoV-<br>sgRNA11 |
|                                      | SADS-sg12-R   | CAACAGTCAGGTCTGGTGGTAATTATCTA<br>CAACAGTAGAAAT | SADSCoV-<br>sgRNA12 |



|                                               |              |                                                    |                     |
|-----------------------------------------------|--------------|----------------------------------------------------|---------------------|
|                                               | SADS-sg13-R  | CGTTCACAGTCTCGTTCTCGCAATATCTAC<br>AACAGTAGAAAT     | SADSCoV-<br>sgRNA13 |
|                                               | SADS-sg14-R  | CAGTCTCGTTCTCGCAATCAAAGTATCTA<br>CAACAGTAGAAAT     | SADSCoV-<br>sgRNA14 |
|                                               | PDCoV-sg1-R  | TCTAGCGTTGAAGGGGTCAACTCTATCTA<br>CAACAGTAGAAAT     | PDCoV-<br>sgRNA1    |
|                                               | PDCoV-sg2-R  | GCCGGACATGTGCCTGGTGTTCAGATCTA<br>CAACAGTAGAAAT     | PDCoV-<br>sgRNA2    |
| <b>sgRNA (For<br/>In Vitro<br/>synthesis)</b> | PDCoV-sg3-R  | CTGAGAAATGGTTTCACCCTTGGGATCTA<br>CAACAGTAGAAAT     | PDCoV-<br>sgRNA3    |
|                                               | PDCoV-sg4-R  | CAGAGGCACAGGCAATCAGCCCAGATCT<br>ACAACAGTAGAAAT     | PDCoV-<br>sgRNA4    |
|                                               | PDCoV-sg5-R  | CACTTCTATTAAACCTCATGTTGCATCTAC<br>AACAGTAGAAAT     | PDCoV-<br>sgRNA5    |
|                                               | PDCoV-sg6-R  | ATCCTTAAGTCTCCCATAGTCAGGATCTAC<br>AACAGTAGAAAT     | PDCoV-<br>sgRNA6    |
|                                               | PDCoV-sg7-R  | CATCCTTAAGTCTCCCATAGTCAGATCTAC<br>AACAGTAGAAAT     | PDCoV-<br>sgRNA7    |
|                                               | PDCoV-sg8-R  | GGGTTCGGGAGCTGACACTTCTATATCTA<br>CAACAGTAGAAAT     | PDCoV-<br>sgRNA8    |
|                                               | PDCoV-sg9-R  | TGGCACCAGTACGAGACCGGTTGCATCTA<br>CAACAGTAGAAAT     | PDCoV-<br>sgRNA9    |
|                                               | PDCoV-sg10-R | CGAGACCGGTTGCCAAATACCTGAATCTA<br>CAACAGTAGAAAT     | PDCoV-<br>sgRNA10   |
|                                               | PDCoV-sg11-R | AGTTGCTCTCAAGGTGGCCAGCGAATCTA<br>CAACAGTAGAAAT     | PDCoV-<br>sgRNA11   |
|                                               | PDCoV-sg12-R | AAGTTGCTCTCAAGGTGGCCAGCGATCTA<br>CAACAGTAGAAAT     | PDCoV-<br>sgRNA12   |
| <b>LAMP<br/>primers</b>                       | PEDV-L1-F3   | GCACTGTTTAAAGCGTCTT                                |                     |
|                                               | PEDV-L1-B3   | AGGAAAGAAAGTGTCTAGT                                |                     |
|                                               | PEDV-L1-FIP  | GCACCACAATAATATAAAAGTGGGCGGC<br>GCAATTATATTATGTTGG |                     |
|                                               | PEDV-L1-BIP  | TTGTTGCACACTTATTGGCAGAAGAGCGC<br>ATTTTATAGCG       |                     |
|                                               | PEDV-L1-LF   | AAGAACAATGACAGCAAAACGC                             |                     |
|                                               | PEDV-L1-LB   | TGTTTAGTCTGCTTTTACTCCTGG                           |                     |
|                                               | PEDV-L2-F3   | GCACTGTTTAAAGCGTCTT                                |                     |

|                 |             |                               |
|-----------------|-------------|-------------------------------|
| LAMP<br>primers | PEDV-L2-B3  | GAGGAAAGAAAGTGTCTAGT          |
|                 | PEDV-L2-FIP | GCACCACAATAATATAAAAGTGGGCGGC  |
|                 |             | GCAATTATATTATGTTGG            |
|                 | PEDV-L2-BIP | TTGTTGCACACTTATTGGCAGAAGAGCGC |
|                 |             | ATTTTATAGCG                   |
|                 | PEDV-L2-LF  | AAGAACAATGACAGCAAAACGC        |
|                 | PEDV-L2-LB  | TGTTTAGTCTGCTTTTACTCCTGG      |
|                 | PEDV-L3-F3  | GTTTAAAGCGTCTTCTTGAG          |
|                 | PEDV-L3-B3  | AGGAAAGAAAGTGTCTAGT           |
|                 | PEDV-L3-FIP | GCACCACAATAATATAAAAGTGGGCGCG  |
|                 |             | CAATTATATTATGTTGGC            |
|                 | PEDV-L3-BIP | TTGTTGCACACTTATTGGCAGAGAGCGCA |
|                 |             | TTTTTATAGCG                   |
|                 | PEDV-L3-LF  | AAGAACAATGACAGCAAAACGC        |
|                 | PEDV-L3-LB  | TGTTTAGTCTGCTTTTACTCCTGG      |
|                 | PEDV-L4-F3  | GTTTAAAGCGTCTTCTTGAG          |
|                 | PEDV-L4-B3  | GAGGAAAGAAAGTGTCTAGT          |
|                 | PEDV-L4-FIP | GCACCACAATAATATAAAAGTGGGCGCG  |
|                 |             | CAATTATATTATGTTGGC            |
|                 | PEDV-L4-BIP | TTGTTGCACACTTATTGGCAGAAGAGCGC |
|                 |             | ATTTTATAGCG                   |
|                 | PEDV-L4-LF  | AAGAACAATGACAGCAAAACGC        |
|                 | PEDV-L4-LB  | TGTTTAGTCTGCTTTTACTCCTGG      |
|                 | TGEV-L1-F3  | GGCAACAATCCAATAACAAGAA        |
|                 | TGEV-L1-B3  | TGAACTGCTTCTAGCTCCA           |
|                 | TGEV-L1-FIP | GTTGCTGTTGTTTTCTGTGTCAGATGACA |
|                 |             | GTGTAGAACAAGC                 |
|                 | TGEV-L1-BIP | ACTCTAAAACAAGAGATACTACGCCCAC  |
|                 |             | ATCACCTTTACCTGCA              |
|                 | TGEV-L1-LF  | ACCTAACTTTTAAAGTGCGGCAAG      |
|                 | TGEV-L1-LB  | GAATGAAAACAAACACACCTGGAAG     |
|                 | TGEV-L2-F3  | AATTTCAACTTGAAGTTAACCAG       |
|                 | TGEV-L2-B3  | AACGAGAACGTTGCTGTT            |

|                         |                |                                                        |
|-------------------------|----------------|--------------------------------------------------------|
| <b>LAMP<br/>primers</b> | TGEV-L2-FIP    | TGCCTCTAGATTGAGATCTGTTTCTTCAAG<br>GGACAATTCAAGGT       |
|                         | TGEV-L2-BIP    | AGAAGGATGACAGTGTAGAACAAGCGTT<br>TTTCTGTGTCAACACCTA     |
|                         | TGEV-L2-LF     | CGAGATCTAGATTGAGAGCGTG                                 |
|                         | TGEV-L2-LB     | GTTCTTGCCGCACTTAA                                      |
|                         | TGEV-L3-F3     | CCAGGCGAATTTCAACTTG                                    |
|                         | TGEV-L3-B3     | GAACGAGAACGTTGCTGT                                     |
|                         | TGEV-L3-FIP    | TGCCTCTAGATTGAGATCTGTTTCTTCAAG<br>GGACAATTCAAGGTC      |
|                         | TGEV-L3-BIP    | AGAAGGATGACAGTGTAGAACAAGCTGT<br>TTTTCTGTGTCAACACC      |
|                         | TGEV-L3-LF     | GACCGAGATCTAGATTGAGAGCG                                |
|                         | TGEV-L3-LB     | TGTTCTTGCCGCACTTAAAAAGTT                               |
|                         | TGEV-L4-F3     | GGCGAATTTCAACTTGAAGT                                   |
|                         | TGEV-L4-B3     | GAACGAGAACGTTGCTGT                                     |
|                         | TGEV-L4-FIP    | GCCTCTAGATTGAGATCTGTTTCTGTCAA<br>GGGACAATTCAAGGT       |
|                         | TGEV-L4-BIP    | GAAGGATGACAGTGTAGAACAAGCTGTT<br>TTTCTGTGTCAACACC       |
|                         | TGEV-L4-LF     | CCGAGATCTAGATTGAGAGCGTG                                |
|                         | TGEV-L4-LB     | TGTTCTTGCCGCACTTAAAAAGT                                |
|                         | TGEV-L5-F3     | TCAAGGTCACGCTCTCAA                                     |
|                         | TGEV-L5-B3     | GTTTGTTTTTATTCTTAGGCG                                  |
|                         | TGEV-L5-FIP    | GCTTGTTCTACACTGTCATCCTTCT<br>ATCTCGGTCTAGAAACAGATC     |
|                         | TGEV-L5-BIP    | GTTAGGTGTTGACACAGAAAAACAAATC<br>TCTTGTTTTAGAGTTACTACGT |
|                         | TGEV-L5-LF     | TGTTGCCTGCCTCTAGATTGA                                  |
|                         | TGEV-L5-LB     | CAGCAACGTTCTCGTTCTAAATCT                               |
|                         | SADSCOV-L1-F3  | ACAAGCTTTGGCAGACTTGG                                   |
|                         | SADSCOV-L1-B3  | GAGCGAGGACCAAAGCATT                                    |
|                         | SADSCOV-L1-FIP | TGCAGGTGAGACAGCTCTGCAGCTTCTAG<br>CCAGTCCAGG            |

|                 |                |                                                |
|-----------------|----------------|------------------------------------------------|
| LAMP<br>primers | SADSCOV-L1-BIP | GCCCCTAAACCGGCTCGTAAGCGCACGT<br>CCTCCTCAGAA    |
|                 | SADSCOV-L1-LF  | CTTCTTGGTTTGGGTGTAT                            |
|                 | SADSCOV-L1-LB  | ACAAACCTGAATGGAAGCGTGT                         |
|                 | SADSCOV-L2-F3  | GCTCAGACACCTCGTGCT                             |
|                 | SADSCOV-L2-B3  | CCATCTGCTTACGAGCCG                             |
|                 | SADSCOV-L2-FIP | AGCTATGCCCAAGTCTGCCAAACCGTCA<br>CAGTCTGTTGACAT |
|                 | SADSCOV-L2-BIP | TCTAGCCAGTCCAGGCCTCAAAGGTGCA<br>GGTGAGACAGCT   |
|                 | SADSCOV-L2-LF  | GCTTGTTTAACTGCAGCAACA                          |
|                 | SADSCOV-L2-LB  | AAATACACCCAAACCAAGAAGC                         |
|                 | SADSCOV-L3-F3  | ACAAGCTTTGGCAGACTTGG                           |
|                 | SADSCOV-L3-B3  | AGAAACTGAGCGAGGACCAA                           |
|                 | SADSCOV-L3-FIP | TGCAGGTGAGACAGCTCTGCTTAGCTTCT<br>AGCCAGTCCAGG  |
|                 | SADSCOV-L3-BIP | TGCCCCTAAACCGGCTCGTAACGCACGTC<br>CTCCTCAGAA    |
|                 | SADSCOV-L3-LF  | TCTTGGTTTGGGTGTAT                              |
|                 | SADSCOV-L3-LB  | CAAACCTGAATGGAAGCGTG                           |
|                 | PDCOV-L1-F3    | GCAATCAGCCCAGGAAACG                            |
|                 | PDCOV-L1-B3    | AACACCAGGCACATGTCC                             |
|                 | PDCOV-L1-FIP   | TCACCCTTGGGTAAAGTCCGCCAGCTGCG<br>GTACGTCGTA    |
|                 | PDCOV-L1-BIP   | ATGTCGGCTCTGCAGACACTGGCTAGAGC<br>CATGATGCGAG   |
|                 | PDCOV-L1-LF    | TGGGAGCTTGATGCTGG                              |
|                 | PDCOV-L1-LB    | AGACGGGTATGGCTGATC                             |
|                 | PDCOV-L2-F3    | GCAATCAGCCCAGGAAACG                            |
|                 | PDCOV-L2-B3    | TCCTGAACACCAGGCACAT                            |
|                 | PDCOV-L2-FIP   | TCACCCTTGGGTAAAGTCCGCCAGCTGCG<br>GTACGTCGTA    |
|                 | PDCOV-L2-BIP   | ATGTCGGCTCTGCAGACACTGGTCCGGCT<br>AGAGCCATGA    |

|           |              |                              |
|-----------|--------------|------------------------------|
|           | PDCOV-L2-LF  | TGGGAGCTTGATGCTGG            |
|           | PDCOV-L2-LB  | GGTATGGCTGATCCTCGC           |
| ssDNA-FQ  | ROX-N12-BHQ2 | /5'-ROX/GTATCCAGTGCG/3'BHQ2/ |
| reporters | JOE-N12-BHQ1 | /5'-JOE/GTATCCAGTGCG/3'BHQ1/ |

---
